# Supplementary material for: Construction of self-enhanced photoelectrochemical platform for l-cysteine detection via electron donor–acceptor type coumarin 545 aggregates
Source: Royal Society of Chemistry journal article supplement (doi:10.1039/d1cc03065e), 2021-01-01
Supplement: d1cc03065e1.pdf [file d1cc03065e1.pdf]

*Electronic Supplementary Information (ESI) for*

**Construction of Self-enhanced Photoelectrochemical Platform for L-cysteine Detection via Electron Donor-acceptor Type Coumarin 545**

**Aggregates**

Hui Meng, Min Chen, Fangjing Mo, Jiang Guo, Pingkun Liu, Yingzi Fu\*

Key Laboratory of Luminescent and Real-Time Analytical Chemistry (Southwest University), Ministry of Education, School of Chemistry and Chemical Engineering, Southwest University, Chongqing 400715, China

1

**List of Contents:**

---

\* Corresponding author: *Yingzi Fu*

Tel: +86-023-68252277

E-mail address: [fyzc@swu.edu.cn](mailto:fyzc@swu.edu.cn)

# Contents

|    |                                                                    |           |
|----|--------------------------------------------------------------------|-----------|
| 1  |                                                                    |           |
| 2  | <b>1. Reagents and apparatus .....</b>                             | <b>1</b>  |
| 3  | <b>2. The synthesis process of S-C545, C-C545 and T-C545 .....</b> | <b>2</b>  |
| 4  | <b>3. The preparation of PEC electrodes .....</b>                  | <b>2</b>  |
| 5  | <b>4. PEC and electrochemical measurement procedures .....</b>     | <b>3</b>  |
| 6  | <b>5. CV and EIS characterizations .....</b>                       | <b>3</b>  |
| 7  | <b>6. The element mapping images of the prepared S-C545.....</b>   | <b>3</b>  |
| 8  | <b>7. Energy Band gap calculations of S-C545.....</b>              | <b>4</b>  |
| 9  | <b>8. Optimization of experimental conditions .....</b>            | <b>6</b>  |
| 10 | <b>9. Calculations about limit of detection .....</b>              | <b>7</b>  |
| 11 | <b>10. Stability of the PEC sensing platform.....</b>              | <b>7</b>  |
| 12 | <b>11. Selectivity of the PEC sensor .....</b>                     | <b>8</b>  |
| 13 | <b>12. Comparison of other analytical methods.....</b>             | <b>9</b>  |
| 14 | <b>13. The real sample analysis .....</b>                          | <b>10</b> |
| 15 | <b>14. References.....</b>                                         | <b>11</b> |

## 16 1. Reagents and apparatus

17 Coumarin 545 (10-(benzo[d]thiazol-2-yl)-2,3,6,7-tetrahydro-1H-pyrano [2,3-  
18 f]pyrido[3,2,1-ij]quinolin-11(5H)-one, 99%) was purchased from TCI Chemical Industry  
19 Development Co., Ltd. (Shanghai). L-cysteine (L-Cys, 99%), glutathione (GSH, 99%),  
20 lysine (Lys, 99%), proline (Pro, 99%), tryptophan (Trp, 99%) and valine (Val, 99%)  
21 were obtained from Bailingwei Technology Co., Ltd. Triton X-100,  
22 cetyltrimethylammonium bromide (CTAB), absolute ethanol, potassium chloride (KCl,  
23 99%), ferrocene (Fc), potassium dihydrogen phosphate ( $\text{KH}_2\text{PO}_4$ ), hydrogen phosphate  
24 disodium ( $\text{Na}_2\text{HPO}_4$ ) were acquired from Chengdu Kelong Chemical Co., Ltd. (Chengdu,  
25 China). Sodium dodecyl sulfate (SDS), tetrahydrofuran (THF, 99%), acetonitrile (99%),  
26 tetrabutylammonium hexafluorophosphate ( $(\text{TBA})\text{PF}_6$ , 98%) were purchased from  
27 Sigma-Aldrich Co., Ltd. (American Life Science and Technology Group Corporation).  
28  $0.1 \text{ mol}\cdot\text{L}^{-1}$  Phosphate buffer saline (PBS, containing  $0.1 \text{ mol}\cdot\text{L}^{-1}$  KCl) with different pH  
29 values were prepared by the different ratios of  $\text{KH}_2\text{PO}_4$  and  $\text{Na}_2\text{HPO}_4$  stock solutions.  $5$   
30  $\text{mmol}\cdot\text{L}^{-1}$   $[\text{Fe}(\text{CN})_6]^{4-/3-}$  solution (pH=7.4) was prepared with  $\text{K}_4\text{Fe}(\text{CN})_6$  and  $\text{K}_3\text{Fe}(\text{CN})_6$ .  
31 Healthy human urine samples offered by volunteers from Southwest University. This  
32 study was approved by the Human Ethics Committee of The Ninth People's Hospital of  
33 Chongqing (2021-LS-K-001) and volunteers were provided informed consent. All  
34 reagents are of analytical grade, without further purification before use. The ultrapure  
35 water was used in whole experiments ( $18.2 \text{ M}\Omega\cdot\text{cm}^{-1}$ ).

36 The Photoelectrochemistry (PEC) and electrochemical measurements were operated at  
37 CHI 440A (configured external LED lamp with the output power about  $14 \text{ mW}\cdot\text{cm}^{-2}$ ) and  
38 CHI 604D electrochemical workstations from Shanghai Chenhua Instrument Co., Ltd.  
39 (China). The UV-vis spectra were recorded by UV-2600 spectrophotometer from  
40 Shimadzu Instruments (Japan). The morphologies of materials were investigated by

41 scanning electron microscope (SEM, equipped with Xford-INCA energy dispersive X-ray  
42 spectrometer (EDX, Xford-INCA)) from Hitachi Instruments Co., Ltd. (Japan). The X-  
43 ray photoelectron spectroscopy (XPS) measurements were performed at Thermo  
44 Scientific Escalab 250Xi. The traditional three-electrode system was adopted in the PEC  
45 and electrochemical experiments, in which glassy carbon electrode (GCE,  $\Phi=4$  mm) or  
46 modified GCE was used as the working electrode, platinum metal as the counter  
47 electrode and the Ag/AgCl electrode as the reference electrode. The experiment  
48 temperature was  $25 \pm 1$  °C.

49

## 50 **2. The synthesis process of S-C545, C-C545 and T-C545**

51 The reprecipitation method was adopted for the synthesis of organic aggregates<sup>1</sup>. The  
52 precursor C545 (2 mg) was dissolved in tetrahydrofuran (THF, 1 mL) with ultrasonic  
53 treatment. Then, the C545/THF solution was injected dropwise into the 5 mL SDS  
54 solution (w=0.1%, anionic surfactant), stirring for 2 h. The synthesized orange red  
55 mixture was centrifuged and washed with ultrapure water several times, then dispersed in  
56 1 mL of water to acquire aggregates solution (S-C545). Similarly, CTAB (cationic  
57 surfactant) and Triton X-100 (nonionic surfactant) were also used to prepare C-C545 and  
58 T-C545 aggregates respectively.

59

## 60 **3. The preparation of PEC electrodes**

61 Before the construction of PEC sensor, the GCE was polished with 0.5, 0.3 and 0.05  
62  $\mu\text{m}$  alumina powder, ultrasonically cleaned with water and absolute ethanol for several  
63 times until the electrode interface became mirror-like smooth. After drying at room  
64 temperature, 10  $\mu\text{L}$  of different C545 aggregates was dropped on the clean GCE,  
65 respectively (denoted as S-C545/GCE, C-C545/GCE, T-C545/GCE), dried naturally for

66 subsequent experiments. Since the C545 aggregates, as a polycyclic aromatic compound,  
67 can be firmly attached on the GCE via  $\pi$ - $\pi$  stacking interaction.

68

#### 69 4. PEC and electrochemical measurement procedures

70 The PEC detection was carried out in 4 mL of 0.1 mol·L<sup>-1</sup> PBS (pH=7.4,  
71 including a series of concentrations of target L-Cys solution) on the CHI 440A  
72 electrochemical workstations, under periodic off-on-off (10-20-10 s) light  
73 radiation and at the applied voltage of 0.0 V. The electrochemical impedance  
74 spectroscopy (EIS) and cyclic voltammetry (CV) measurements were carried on  
75 CHI 604D electrochemical workstations in 5 mmol·L<sup>-1</sup> [Fe(CN)<sub>6</sub>]<sup>3-/4-</sup> solution  
76 (pH=7.4).

77

#### 78 5. CV and EIS characterizations

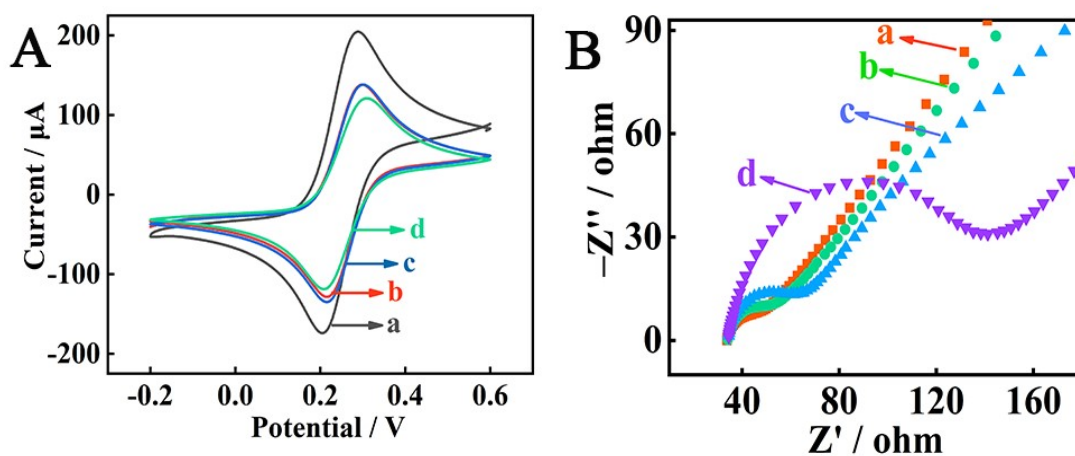

79

80 **Fig. S1.** (A) CV and (B) EIS plots of the different electrodes: (a) bare GCE, (b) S-C545/GCE,  
81 (c) C-C545/GCE, (d) T-C545/GCE.

82

#### 83 6. The element mapping images of the prepared S-C545

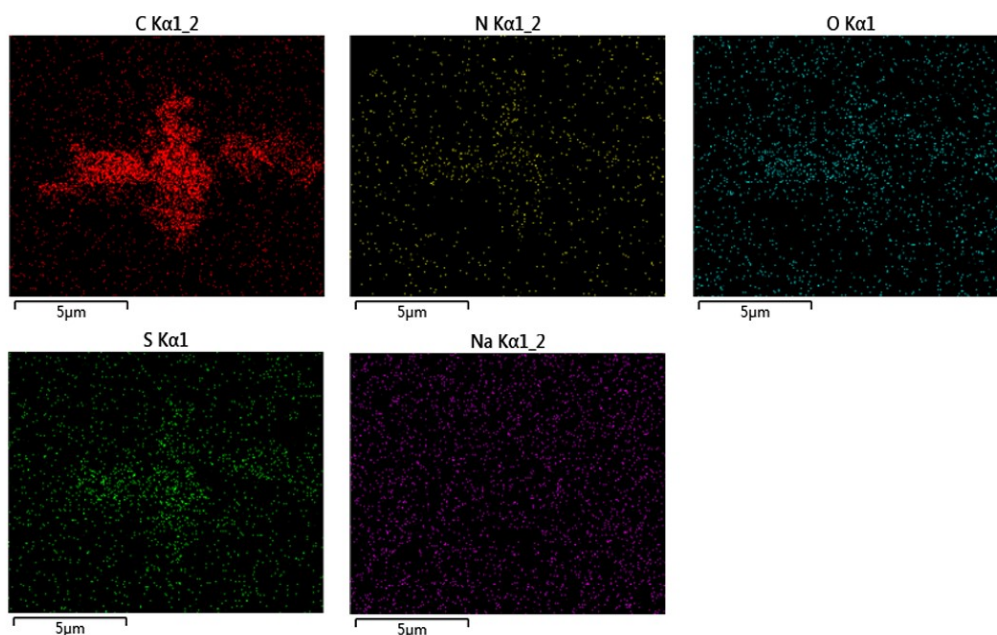

84

85 **Fig. S2.** The elemental mapping images of S-C545 including the elements of C, N, O, S, Na

86

87 **7. Energy Band gap calculations of aggregates**

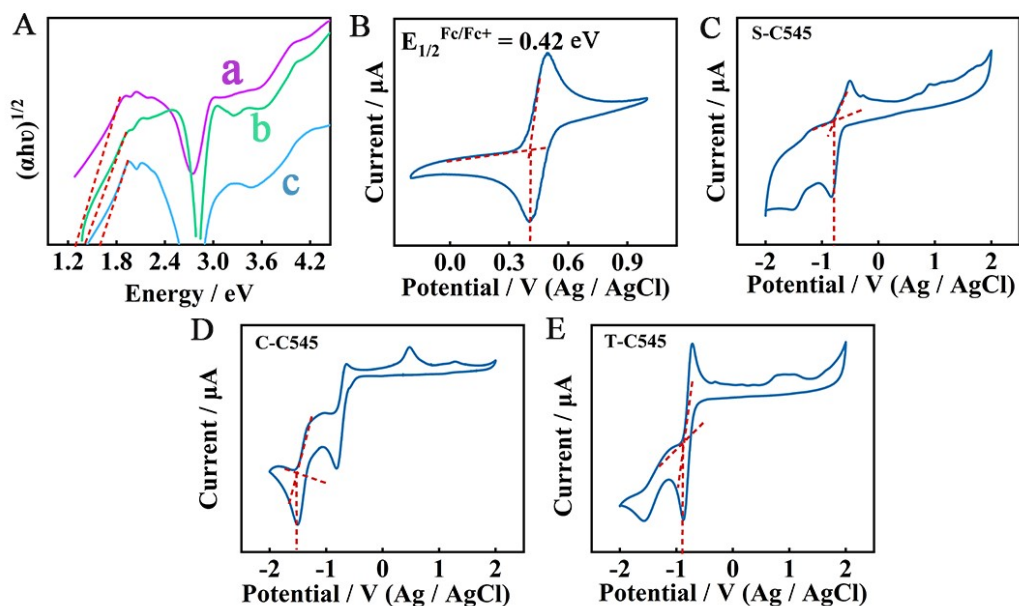

88

89 **Fig. S3.** (A) Tauc plots of indirect transitions: (a) S-C545, (b) C-C545 and (c) T-C545. (B) CV of bare

90 GCE in a deoxygenated anhydrous acetonitrile solution containing  $0.1 \text{ mol}\cdot\text{L}^{-1}$  tetrabutylammonium

91 hexafluorophosphate (TBAPF<sub>6</sub>) and  $0.5 \text{ mmol}\cdot\text{L}^{-1}$  ferrocene (Fc) at scanning rate of  $50 \text{ mV}\cdot\text{s}^{-1}$ . CV

92 of (C) S-C545/GCE, (D) C-C545 and (T) T-C545 as the working electrode in 0.1 mol·L<sup>-1</sup> TBAP<sub>6</sub>  
93 solutions under the same conditions. E<sub>ox</sub> was calculated from tangents of the oxidation peaks of the  
94 species.

95 The energy band gaps (E<sub>g</sub>) of as-prepared S-C545, C-C545 and T-C545 were obtained by  
96 the following equation 1:<sup>2</sup>

$$97 \quad \alpha h\nu = B(h\nu - E_g)^{n/2} \quad (1)$$

98 where  $\alpha$ ,  $h$  and  $\nu$  are absorption coefficient, Planck constant and light frequency,  
99 respectively; E<sub>g</sub> and B are band gap energy and constant, respectively. The n value is 1 or  
100 4 mainly hinging whether the semiconductor has a direct or indirect band gap. The  
101 corresponding band gaps (E<sub>g</sub>) of S-C545, C-C545 and T-C545 were successively  
102 determined as 1.30, 1.42 and 1.60 eV from the tangent to the linear of the plot of  $(\alpha h\nu)^{(1/2)}$   
103 versus  $(h\nu)$  (Fig. S3C~E).

104 The positions of the conduction band (CB) and valence band (VB) edges of S-C545,  
105 C-C545 and T-C545 were determined by their electron affinity (EA) and ionization  
106 potential (IP) using the following formulas (2-3). The energy levels of them can be  
107 obtained by counting its lowest unoccupied molecular orbital (LUMO) and highest  
108 occupied molecular orbital (HOMO) using the following formulas (4-5).

$$109 \quad IP = - (4.80 - E_{1/2}^{Fc/Fc^+} + E_{ox}) \quad (2)$$

$$110 \quad EA = IP + E_g \quad (3)$$

$$111 \quad E_{HOMO} = - (4.80 - E_{1/2}^{Fc/Fc^+} + E_{ox}) \quad (4)$$

$$112 \quad E_{LUMO} = E_{HOMO} + E_g \quad (5)$$

113 E<sub>1/2</sub><sup>Fc/Fc<sup>+</sup></sup> is the formal potential of Fc/Fc<sup>+</sup>, E<sub>ox</sub> is the oxidation initiation potential.  
114 Potentials are calibrated with the ferrocene/ferrocenium (Fc/Fc<sup>+</sup>) couple, and the potential

115 of  $\text{Fc}/\text{Fc}^+$  has an absolute energy level of 4.80 eV to vacuum.<sup>3</sup> At the scan rate of 50  
116  $\text{mV}\cdot\text{s}^{-1}$  in  $0.5\text{ mmol}\cdot\text{L}^{-1}$  Fc solution, using bare GCE as working electrode, the  $E_{1/2}^{\text{Fc}/\text{Fc}^+}$   
117 located at 0.42 V (curve c in Fig. S3B) was obtained. Eventually, the HOMO/LUMO are  
118 calculated as  $-3.59/-2.29\text{ eV}$ ,  $-2.86/-1.44\text{ eV}$  and  $-3.49/-1.89\text{ eV}$ , respectively.

119

## 120 8. Optimization of experimental conditions

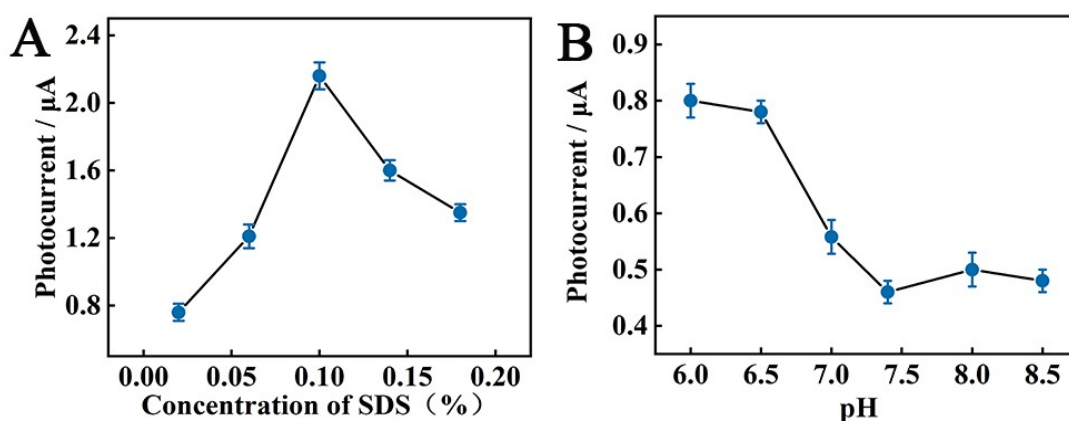

121

122 **Fig. S4.** The influence of (A) SDS concentration (wt%) and (B) the pH value toward the PEC  
123 sensor.

124 The amount of the SDS used for the synthesis of S-C545 and the pH value of the test  
125 solution were determined to acquire the best analytic performance of the PEC sensor. The  
126 photocurrent responses of corresponding S-C545 increase with the SDS concentration  
127 from 0.02% to 0.1%, however, the PEC responses reach a maximum value at 0.1% and  
128 decrease gradually as the increasing dosage (Fig. S4A). The isoelectric point of L-Cys is  
129 about 5.1.<sup>4</sup> When the pH value is over 5.1, the main form of L-Cys in the solution is L-  
130  $\text{Cys}^-$  anion. As the pH value elevates, the enhanced reducibility of L- $\text{Cys}^-$  causes the  
131 improved quenching effect on the sensing signal and the significant decrease of  
132 photocurrent. After the pH value reaching 7.4, the photocurrent signal tends to be stable



133 (Fig. S4.B). Therefore, 0.1% SDS-assisted S-C545 was selected as photoactive matrix to  
134 prepare the PEC sensor, additionally, the PEC detection was performed under the  
135 condition of pH 7.4.

### 136 9. Calculations about limit of detection

137 The limit of detection (LOD) and limit of quantitation (LOQ) were calculated in  
138 details.<sup>5</sup> The Parallel measurements for blank samples were performed six times. The  
139 averaged photocurrent is 2.085  $\mu\text{A}$  with standard deviation ( $S_B$ ) of 0.043. It is found that  
140 the photocurrent differences ( $\Delta I$ ) linearly depends on the logarithm of L-Cys  
141 concentration ( $c$ ) with signal-to-noise ratio ( $S/N = k_1$ ) of 3. So when the  $I_B$  is zero ( $I_B = 0$ ),  
142 the smallest detectable negative PEC signal is expressed as

$$143 \quad I_L = I_B + k_1 S_B = -0.129$$

144 According to the linear regression equation  $\Delta I = -0.25 \lg c - 0.28$ , the LOD was  
145 calculated as  $2.5 \times 10^{-10} \text{ mol} \cdot \text{mL}^{-1}$ .<sup>6</sup>

146

### 147 10. Stability of the PEC sensing platform

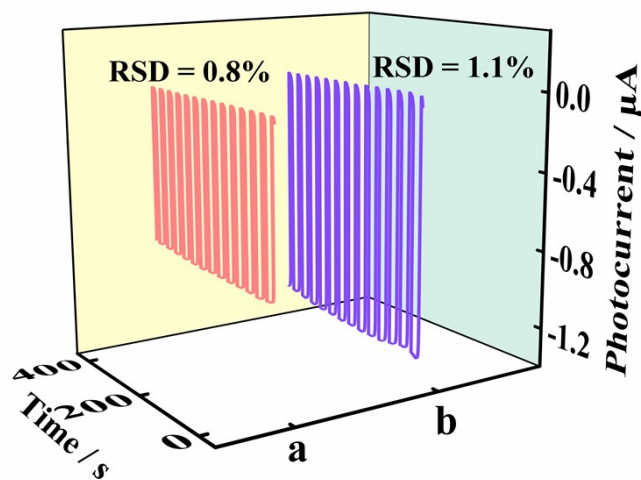

148

149 **Fig. S5.** Time-dependent PEC responses in (a)  $10^{-5} \text{ mol}\cdot\text{L}^{-1}$  and (b)  $10^{-7} \text{ mol}\cdot\text{L}^{-1}$  L-Cys under periodic  
150 off-on illumination for 400 s

151 The stability of the proposed PEC sensor for L-Cys detection was carried out under  
152 periodic off-on-off light for 400 s. As depicted in Fig. S5, the relative standard deviation  
153 (RSD) for the PEC responses of L-Cys ( $10^{-5}$  and  $10^{-7} \text{ mol}\cdot\text{L}^{-1}$ ) is 0.8% and 1.1%  
154 respectively, proving the good stability.

155

## 156 11. Selectivity of the PEC sensor

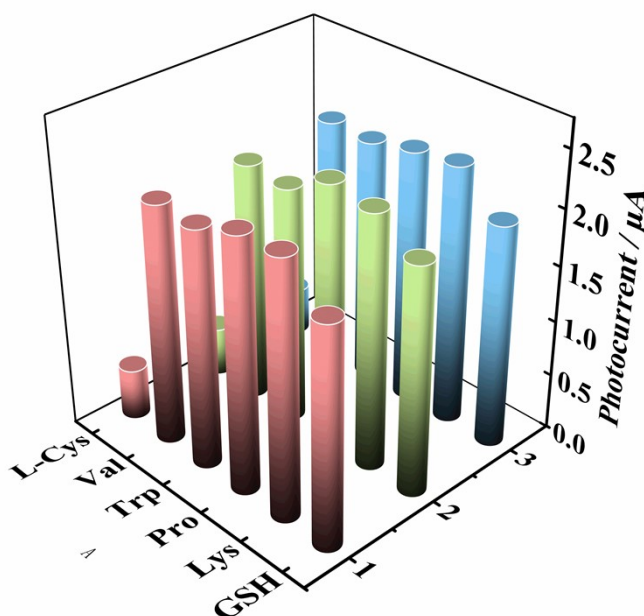

157

158 **Fig. S6.** The selectivity of the PEC sensor containing different interferences: Val ( $10^{-4} \text{ mol}\cdot\text{L}^{-1}$ ),  
159 Trp ( $10^{-4} \text{ mol}\cdot\text{L}^{-1}$ ), Pro ( $10^{-4} \text{ mol}\cdot\text{L}^{-1}$ ), Lys ( $10^{-4} \text{ mol}\cdot\text{L}^{-1}$ ) and GSH ( $10^{-6} \text{ mol}\cdot\text{L}^{-1}$ )

160 The selectivity was evaluated by adopting several interfering substances in control  
161 experiments such as glutathione (GSH,  $10^{-6} \text{ mol}\cdot\text{L}^{-1}$ ), Lysine (Lys,  $10^{-4} \text{ mol}\cdot\text{L}^{-1}$ ), Proline  
162 (Pro,  $10^{-4} \text{ mol}\cdot\text{L}^{-1}$ ), Tryptophan (Trp,  $10^{-4} \text{ mol}\cdot\text{L}^{-1}$ ) and valine (Val,  $10^{-4} \text{ mol}\cdot\text{L}^{-1}$ ). From  
163 Fig. S6, as the concentration of GSH was lower than  $10^{-6} \text{ mol}\cdot\text{L}^{-1}$ , little effect on PEC  
164 analysis. Besides, the PEC responses of Lys, Pro, and Val show an evident increase

165 compared with the L-Cys. Hence, the above results indicate that the PEC sensor is  
166 provided with good selectivity for detection of L-Cys.

167

## 168 12. Comparison of other analytical methods

169 The PEC sensor constructed by S-C545 with D-A configuration was compared  
170 with the previously reported analytic methods for L-Cys detection. The proposed  
171 PEC sensor demonstrated the wider linear range and lower LOD. It is primarily on  
172 account of the self-enhanced effect of the D-A type photoelectric material without  
173 the addition of electron donors, which may lessen the background interference,  
174 thereby improve the performance of the PEC sensor to some extent (Table S1).

175 **Table S1** Comparison for different methods for L-Cys detection

| Analysis method | Linear range (mol·L <sup>-1</sup> )         | LOD (mol·L <sup>-1</sup> ) | Reference        |
|-----------------|---------------------------------------------|----------------------------|------------------|
| CV              | 1.0×10 <sup>-6</sup> ~1.1×10 <sup>-6</sup>  | 3.1×10 <sup>-7</sup>       | [7]              |
| CS              | 1.0×10 <sup>-6</sup> ~1.0×10 <sup>-4</sup>  | 9.2×10 <sup>-8</sup>       | [8]              |
| ECL             | 1.3×10 <sup>-6</sup> ~3.5 ×10 <sup>-5</sup> | 8.7×10 <sup>-7</sup>       | [9]              |
| PEC             | 2.0×10 <sup>-7</sup> ~ 1×10 <sup>-6</sup>   | 5.0×10 <sup>-8</sup>       | [10]             |
| PEC             | 1.0 ×10 <sup>-9</sup> ~ 1×10 <sup>-3</sup>  | 2.5×10 <sup>-10</sup>      | <b>This work</b> |

176 **Abbreviation:** Colorimetric sensing (CS), Electrochemiluminescence (ECL)

177

## 178 13. The real sample analysis

179 Additionally, the feasibility of the proposed sensor in biological samples was  
180 explored, the analysis was conducted in healthy human urine samples. The human  
181 urine was centrifuged, diluted 50 times and the pH was adjust to 7.4. Afterwards, a  
182 series concentrations of L-Cys were added into the diluted human urine sample.

183 The recovery rates of L-Cys were calculated via the standard addition method. As  
184 listed in Table S2, the recovery concentration was calculated through the obtained  
185 regression equation, and the recovery rate ranges from 97% to 103.0% with the  
186 RSD (2.6%~3.5%). The above results show that the self-enhanced PEC sensor  
187 underlies the foundation for the detection of L-Cys applied in real human samples

188

**Table S2.** Determination of L-Cys in human urine samples

| <b>Sample</b> | <b>Spiked(mol·L<sup>-1</sup>)</b> | <b>Found(mol·L<sup>-1</sup>)</b> | <b>Recovery/%</b> | <b>RSD/%</b> |
|---------------|-----------------------------------|----------------------------------|-------------------|--------------|
| <b>1</b>      | 1.0×10 <sup>-4</sup>              | 0.97×10 <sup>-4</sup>            | 97.0              | 2.8          |
| <b>2</b>      | 1.5×10 <sup>-6</sup>              | 1.54×10 <sup>-6</sup>            | 102.6             | 2.6          |
| <b>3</b>      | 1.0×10 <sup>-8</sup>              | 1.03×10 <sup>-8</sup>            | 103.0             | 3.5          |

189

190

191 **14. References**

192 1 H. R. Chung, E. Kwon, H. Oikawa, H. Kasai; H. Nakanishi,. *Cryst Growth Des.*,  
193 2006, 294, 459-463.

194 2 Q. Wang, Y. F. Ruan, W. W. Zhao, P. Lin, J. J. Xu and H. Y. Chen, *Anal. Chem.*  
195 **2018**, 90, 3759-3765.

196 3 T. Edvinsson, , C. Li, , N. Pschirer, J.SchNeboom, F. Eickemeyer and R. Sens, *J.*  
197 *Phys. Chem. C*, 2007, 111, 15137-15140.

198 4 M. Zhou, J. Ding, L. P. Guo and Q. K. Shang, *Anal. Chem.*, 2007, 5328-5335; N.  
199 Spătaru, B. V. Sarada, E. Popa, D. A. Tryk and A. Fujishima, *Anal. Chem.*, **2001**  
200 514-519.

201 5 C. Wang, Q. Han, P. K. Liu, G. Zhang, L. Song, X. Zou and Y. Z. Fu, *ACS Sensors*,  
202 **2021**, 6, 252-258.

203 6 A. E. Radi, J. L. Acero Sánchez, E. Baldrich and C. K. O'Sullivan, *J. Am. Chem. Soc.*,  
204 **2006**, 117-124.

205 7 .K. Ozoemena, P. Westbroek, T. Nyokong, *Electrochem. Commun.*, **2001**, 3, 529-534.

206 8 L. Xiao, Y. Y. Xi, J. Q. Sha, T. Han, C. J. Du, S Y. Jun and Y. Q. Lan, *ACS Appl.*  
207 *Mater. Interfaces*, **2019**, 11, 18, 16896-16904.

208 9 L. Hua, Han, H.; Zhang, X., *Talanta*, **2009**, 77, 1654-1659.

209 10 Y. H. Zhu, Z. W. Xu, K. Yan, H. Zhao and J. D. Zhang, *ACS Appl. Mater. Interfaces*,  
210 **2017**, 9, 40452-40460.
